# Supplementary material for: Association of Parkinson’s Disease and Its Subtypes with Agricultural Pesticide Exposures in Men: A Case–Control Study in France
Source: PubMed Central journal article supplement (PMC4629732; doi:10.1289/ehp.1307970), 2015-03-27
Supplement: ehp.1307970.s001.acco.pdf [file ehp.1307970.s001.acco.pdf]

**Note to Readers:** *EHP* strives to ensure that all journal content is accessible to all readers. However, some figures and Supplemental Material published in *EHP* articles may not conform to 508 standards due to the complexity of the information being presented. If you need assistance accessing journal content, please contact [ehp508@niehs.nih.gov](mailto:ehp508@niehs.nih.gov). Our staff will work with you to assess and meet your accessibility needs within 3 working days.

## **Supplemental Material**

# **Association of Parkinson's Disease and Its Subtypes with Agricultural Pesticide Exposures in Men: A Case–Control Study in France**

Frédéric Moisan, Johan Spinosi, Laurène Delabre, Véronique Gourlet, Jean-Louis Mazurie, Isabelle Bénatru, Marcel Goldberg, Marc G. Weisskopf, Ellen Imbernon, Christophe Tzourio, and Alexis Elbaz

### **Table of Contents**

**Figure S1.** Indicators of pesticide exposure. <sup>a</sup>Reference date: for cases, the year of PD onset; for controls, the year of PD onset of the matched case.

**Table S1.** Independent and joint effects of intensity of exposure to insecticides and fungicides among male farmers.

**Table S2.** Association of Parkinson's disease with indicators of professional exposure to pesticides among male farmers according to three latency periods.

**Table S3.** Association of Parkinson's disease with indicators of professional exposure to broad classes of pesticides (herbicides, fungicides, insecticides) among male farmers restricted to cases with disease duration of 3 years or less.

**Table S4.** Characteristics of controls and tremor dominant and non-tremor dominant Parkinson's disease cases among male farmers.

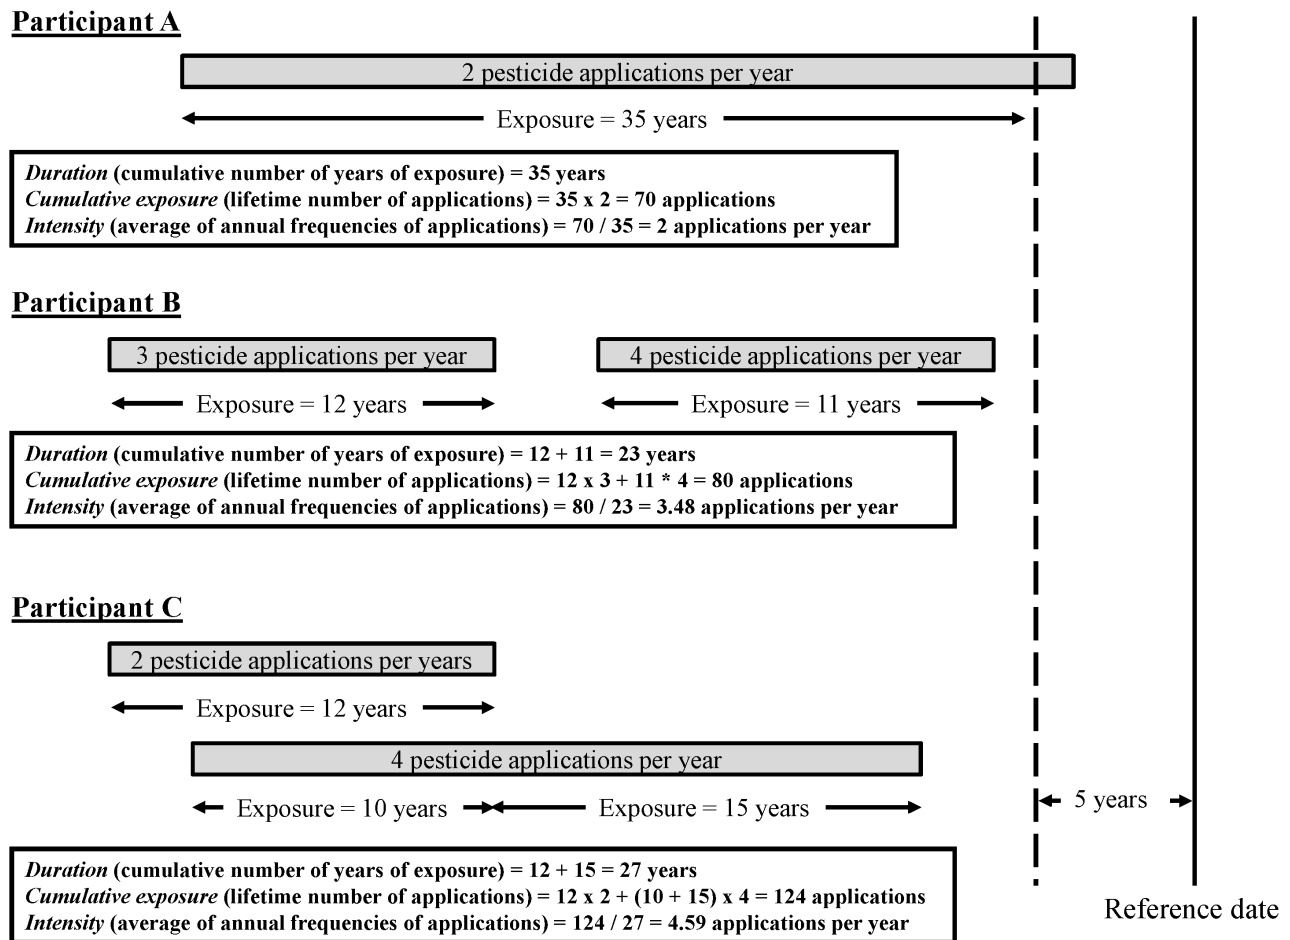

**Figure S1.** Indicators of pesticide exposure. <sup>a</sup>Reference date: for cases, the year of PD onset; for controls, the year of PD onset of the matched case.

**Table S1.** Independent and joint effects of intensity of exposure to insecticides and fungicides among male farmers.

| Intensity of fungicide exposure <sup>a</sup> | Intensity of insecticide exposure <sup>a</sup> | Cases<br>( <i>n</i> = 133) <sup>b</sup><br><i>n</i> (%) | Controls<br>( <i>n</i> = 298) <sup>b</sup><br><i>n</i> (%) | OR (95% CI) <sup>c</sup> |
|----------------------------------------------|------------------------------------------------|---------------------------------------------------------|------------------------------------------------------------|--------------------------|
| Low <sup>d</sup>                             | Low                                            | 16 (12)                                                 | 64 (22)                                                    | Reference                |
| High <sup>e</sup>                            | Low                                            | 26 (20)                                                 | 48 (16)                                                    | 2.42 (0.99, 5.91)        |
| Low                                          | High                                           | 25 (19)                                                 | 61 (21)                                                    | 2.04 (0.90, 4.64)        |
| High                                         | High                                           | 65 (49)                                                 | 120 (41)                                                   | 3.68 (1.61, 8.42)        |

<sup>a</sup>Expressed in average number of applications per year. <sup>b</sup>Six missing values (one case and five controls).

<sup>c</sup>Odds ratios and 95% confidence intervals (OR, 95% CI) were computed among male farmers using conditional logistic regression and adjusted for age, district, duration of smoking, duration of coffee drinking, MMSE, family history of PD, and use of pesticides for seeds. <sup>d</sup>Q1 (not exposed or exposure <1.04 applications per year for insecticides and <1.50 applications per year for fungicides). <sup>e</sup>Q2 (1.04-1.77 for insecticides, 1.50-4.00 for fungicides) + Q3 (1.78-3.02 for insecticides, 4.02-11.06 for fungicides) + Q4 (>3.02 for insecticides, >11.06 for fungicides).

**Table S2.** Association of Parkinson’s disease with indicators of professional exposure to pesticides among male farmers according to three latency periods.

| Latency period/Groups       | Duration of exposure<br>OR (95% CI) <sup>a</sup> | <i>p</i> for trend | Cumulative exposure<br>OR (95% CI) <sup>a</sup> | <i>p</i> for trend | Average exposure intensity<br>OR (95% CI) <sup>a</sup> | <i>p</i> for trend |
|-----------------------------|--------------------------------------------------|--------------------|-------------------------------------------------|--------------------|--------------------------------------------------------|--------------------|
| Two years <sup>b</sup>      |                                                  |                    |                                                 |                    |                                                        |                    |
| 1                           | Reference                                        |                    | Reference                                       |                    | Reference                                              |                    |
| 2                           | 1.20 (0.62, 2.33)                                |                    | 0.86 (0.42, 1.74)                               |                    | 1.18 (0.59, 2.37)                                      |                    |
| 3                           | 1.22 (0.63, 2.35)                                |                    | 1.57 (0.81, 3.08)                               |                    | 2.08 (1.00, 4.33)                                      |                    |
| 4                           | 3.27 (1.41, 7.59)                                | 0.384              | 1.80 (0.85, 3.80)                               | 0.089              | 2.69 (1.21, 5.98)                                      | 0.014              |
| Ten years <sup>b</sup>      |                                                  |                    |                                                 |                    |                                                        |                    |
| 1                           | Reference                                        |                    | Reference                                       |                    | Reference                                              |                    |
| 2                           | 0.70 (0.35, 1.39)                                |                    | 0.71 (0.34, 1.48)                               |                    | 1.10 (0.56, 2.17)                                      |                    |
| 3                           | 1.07 (0.55, 2.09)                                |                    | 1.23 (0.61, 2.47)                               |                    | 1.61 (0.78, 3.35)                                      |                    |
| 4                           | 1.20 (0.60, 2.38)                                | 0.515              | 1.99 (0.95, 4.21)                               | 0.018              | 2.83 (1.27, 6.28)                                      | 0.007              |
| Twenty years <sup>b,c</sup> |                                                  |                    |                                                 |                    |                                                        |                    |
| 1                           | Reference                                        |                    | Reference                                       |                    | Reference                                              |                    |
| 2                           | 0.73 (0.39, 1.36)                                |                    | 0.50 (0.23, 1.09)                               |                    | 0.68 (0.33, 1.40)                                      |                    |
| 3                           | 1.13 (0.55, 2.33)                                |                    | 1.34 (0.68, 2.61)                               |                    | 1.67 (0.83, 3.37)                                      |                    |
| 4                           | 1.17 (0.58, 2.36)                                | 0.364              | 1.63 (0.77, 3.49)                               | 0.072              | 2.20 (1.02, 4.75)                                      | 0.021              |

Abbreviations: CI, confidence interval; MMSE, mini-mental state examination; OR, odds ratio; PD, Parkinson’s disease.

<sup>a</sup>Odds ratios and 95% confidence intervals were computed among male farmers using conditional logistic regression adjusted for age, district, duration of smoking, duration of coffee drinking, MMSE, family history of PD, and use of pesticides for seeds. <sup>b</sup>Seven missing values (one case, six controls). <sup>c</sup>Analyses conducted among 132 exposed cases and 293 exposed controls (one case and five controls were not considered exposed when the last 20 years were not taken into account).

**Table S3.** Association of Parkinson’s disease with indicators of professional exposure to broad classes of pesticides (herbicides, fungicides, insecticides) among male farmers restricted to cases with disease duration of 3 years or less.

| Classes of pesticides/Groups | Ca/Co<br><i>n</i> | Duration of exposure<br>OR (95% CI) <sup>a</sup> | Ca/Co<br><i>n</i>               | Cumulative exposure<br>OR (95% CI) <sup>a</sup> | Ca/Co<br><i>n</i>               | Average exposure intensity<br>OR (95% CI) <sup>a</sup> |
|------------------------------|-------------------|--------------------------------------------------|---------------------------------|-------------------------------------------------|---------------------------------|--------------------------------------------------------|
| Herbicides                   | Low <sup>b</sup>  | 8/33                                             | Reference                       | 9/27                                            | Reference                       | 10/28                                                  |
|                              | High <sup>c</sup> | 26/49                                            | 3.19 (1.19, 8.51) <sup>d</sup>  | 25/55                                           | 1.91 (0.71, 5.15) <sup>d</sup>  | 24/54                                                  |
| Fungicides                   | Low               | 9/43                                             | Reference                       | 6/35                                            | Reference                       | 8/35                                                   |
|                              | High              | 25/39                                            | 5.90 (1.70, 20.44) <sup>e</sup> | 28/47                                           | 6.49 (1.68, 25.00) <sup>e</sup> | 26/47                                                  |
| Insecticides                 | Low               | 9/32                                             | Reference                       | 8/31                                            | Reference                       | 8/36                                                   |
|                              | High              | 25/50                                            | 2.24 (0.89, 5.77) <sup>f</sup>  | 26/51                                           | 2.75 (0.94, 8.06) <sup>f</sup>  | 26/46                                                  |

Abbreviations: Ca, cases; CI, confidence interval; Co, controls; MMSE, mini-mental state examination; OR, odds ratio; PD, Parkinson’s disease.

<sup>a</sup>Odds ratios and 95% confidence intervals computed among exposed male farmers using conditional logistic regression adjusted for age, district, duration of smoking, duration of coffee drinking, MMSE, family history of PD, and use of pesticides for seeds. <sup>b</sup>Unexposed or in the first quartile of exposure (See Table 3 for cut-off). <sup>c</sup>In the second, third or fourth quartile of exposure (See Table 3 for cut-off). <sup>d</sup>Corresponding estimates including all cases and controls were 1.09 (0.65, 1.82) for duration, 1.23 (0.73, 2.09) for cumulative exposure, and 1.09 (0.66, 1.81) for average exposure intensity. <sup>e</sup>Corresponding estimates including all cases and controls were 1.56 (0.91, 2.66) for duration, 2.51 (1.35, 4.67) for cumulative exposure, and 2.17 (1.17, 4.05) for average exposure intensity. <sup>f</sup>Corresponding estimates including all cases and controls were 0.91 (0.57-1.47) for duration, 1.23 (0.76, 2.00) for cumulative exposure, and 1.83 (1.08, 3.09) for average exposure intensity.

**Table S4.** Characteristics of controls and tremor dominant and non-tremor dominant Parkinson’s disease cases among male farmers.

| <b>Characteristic</b>                                  | <b>Tremor dominant cases</b> | <b>Non-tremor predominant cases</b> | <b>Controls</b> |
|--------------------------------------------------------|------------------------------|-------------------------------------|-----------------|
| <i>n</i>                                               | 66                           | 59                                  | 298             |
| Age of onset (years), median                           | 67.5                         | 68.0                                | n.a.            |
| Duration of PD (years), median                         | 6                            | 6                                   | n.a.            |
| Main signs at disease onset, <i>n</i> (%) <sup>a</sup> |                              |                                     |                 |
| Bradykinesia                                           | 14 (21)                      | 50 (85)                             | n.a.            |
| Rigidity                                               | 11 (17)                      | 36 (62)                             | n.a.            |
| Tremor                                                 | 62 (94)                      | 16 (27)                             | n.a.            |
| Asymmetry of symptoms at disease onset, <i>n</i> (%)   | 59 (89)                      | 44 (74)                             | n.a.            |
| Hoehn and Yahr scale, median                           | 2.5                          | 2.5                                 | n.a.            |
| Smoking                                                |                              |                                     |                 |
| Ever smoking, <i>n</i> (%)                             | 27 (41)                      | 14 (24)                             | 154 (52)        |
| Duration of smoking <sup>b</sup> , median              | 18                           | 27                                  | 30              |
| Coffee drinking                                        |                              |                                     |                 |
| Ever consumed, <i>n</i> (%)                            | 55 (83)                      | 42 (74)                             | 250 (84)        |
| Duration of coffee drinking <sup>c</sup> , median      | 50                           | 50                                  | 54              |
| MMSE, median                                           | 26                           | 24                                  | 27              |
| Family history of PD (parents, siblings), <i>n</i> (%) | 6 (9)                        | 5 (9)                               | 10 (3)          |
| Parents (at least one) worked as farmers, <i>n</i> (%) | 63 (96)                      | 55 (98)                             | 279 (95)        |

Abbreviations: MMSE, mini-mental state examination; n.a., not applicable; PD, Parkinson’s disease.

<sup>a</sup>Sum exceeds 100% since cases can have multiple signs at disease onset. <sup>b</sup>Among ever smokers. <sup>c</sup>Among ever coffee drinkers.
